# Supplementary material for: A Metabolic Widget Adjusts the Phosphoenolpyruvate-Dependent Fructose Influx in Pseudomonas putida
Source: PubMed Central journal article supplement (PMC5141268; doi:10.1128/msystems.00154-16), 2016-12-06
Supplement: sys006162068sf2.pdf [file sys006162068sf2.pdf]

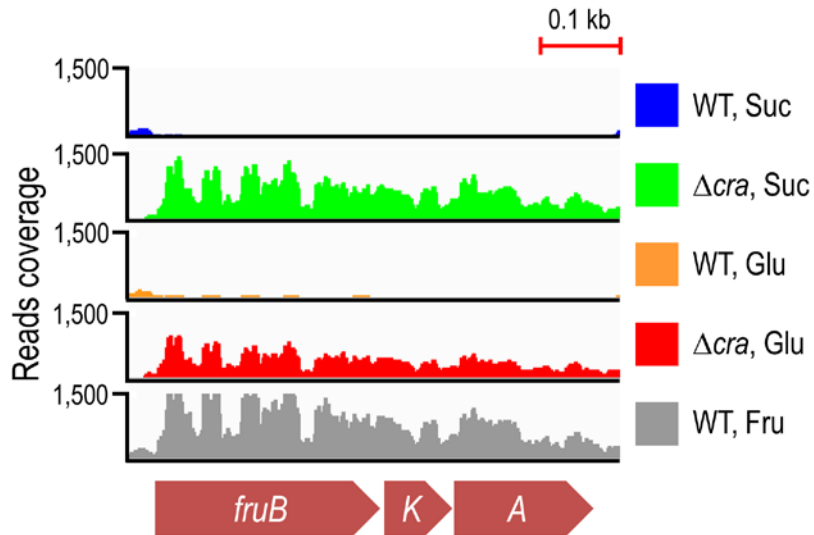

Fig. S2. Sequence coverage plots for the *fruBKA* gene cluster of *Pseudomonas putida* KT2440 and its  $\Delta$ *cra* derivative analyzed at the single-nucleotide level. Data correspond to the expression pattern for samples taken during the mid-logarithmic phase of growth in cultures developed on glucose (Glu), fructose (Fru), or succinate (Suc) as the sole carbon source. WT, wild-type strain.
