# Supplementary material for: A Metabolic Widget Adjusts the Phosphoenolpyruvate-Dependent Fructose Influx in Pseudomonas putida
Source: PubMed Central journal article supplement (PMC5141268; doi:10.1128/msystems.00154-16), 2016-12-06
Supplement: sys006162068sf4.pdf [file sys006162068sf4.pdf]

## (A) Reactions in the model

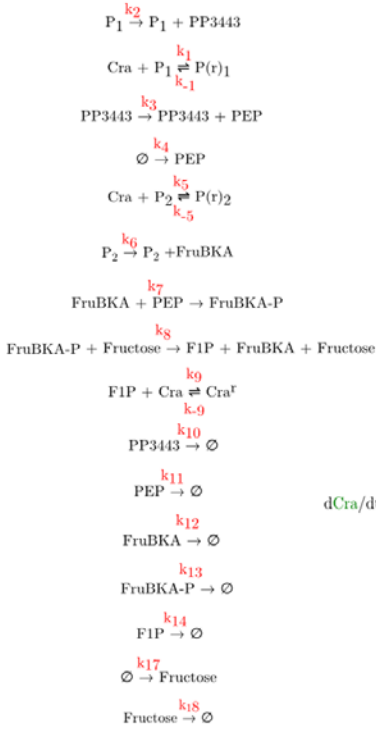

## (B) Ordinary differential equations

$$\begin{aligned}
dP_1/dt &= k_{-1} \cdot P(r)_1 - k_1 \cdot Cra \cdot P_1 \\
dP(r)_1/dt &= k_1 \cdot Cra \cdot P_1 - k_{-1} \cdot P(r)_1 \\
dP_2/dt &= k_{-5} \cdot P(r)_2 - k_5 \cdot Cra \cdot P_2 \\
dP(r)_2/dt &= k_5 \cdot Cra \cdot P_2 - k_{-5} \cdot P(r)_2 \\
dPP3443/dt &= k_2 \cdot P_1 - k_{10} \cdot PP3443 \\
dPEP/dt &= k_3 \cdot PP3443 + k_4 - k_7 \cdot Fru \cdot PEP - k_{11} \cdot PEP \\
dFruBKA/dt &= k_6 \cdot P_2 - k_7 \cdot FruBKA \cdot PEP + k_8 \cdot FruBKA-P \cdot Fructose - k_{12} \cdot FruBKA \\
dFruBKA-P/dt &= k_7 \cdot FruBKA \cdot PEP - k_8 \cdot FruBKA-P \cdot Fructose - k_{13} \cdot FruBKA-P \\
dF1P/dt &= k_8 \cdot FruBKA-P \cdot Fructose + k_9 \cdot Cra^F - k_9 \cdot F1P \cdot Cra - k_{14} \cdot F1P \\
dCra^F/dt &= k_9 \cdot F1P \cdot Cra - k_9 \cdot Cra^F - k_{16} \cdot Cra^F \\
dCra/dt &= k_9 \cdot Cra^F - k_9 \cdot F1P \cdot Cra + k_{-1} \cdot P(r)_1 - k_1 \cdot Cra \cdot P_1 + k_{-5} \cdot P(r)_2 - k_5 \cdot Cra \cdot P_2 - k_{15} \cdot Cra \\
dFructose/dt &= k_{17} - k_{18}
\end{aligned}$$

**Fig. S4. Reactions used in the kinetic model and ordinary differential equations utilized for the calculations.** The kinetic model proposed in Fig. 5 in the main text is composed of a series of reactions (A), that were interpreted by means of a set of ordinary differential equations (B). In the model,  $k_1$  and  $k_{-1}$  represent the binding and unbinding rates, respectively, of the Cra regulator to promoter  $P_1$  (controlling the expression of  $PP\_3443$ ). They were estimated to have the same value as  $k_5$  and  $k_{-5}$ , experimentally measured in a previous work, and they represent the binding and unbinding rates, respectively, of the Cra regulator to promoter  $P_2$  (controlling the expression of  $fruBKA$ ). The  $k_2$  parameter merges transcription and translation into a single event (represented as such for the sake of simplicity). Rates  $k_3$  and  $k_4$  describe the production of phosphoenolpyruvate (PEP) either from  $PP\_3443$  or other sources, respectively. These values were adjusted to experimental observations. The  $k_6$  parameter represents the transcription and translation of  $fruBKA$ . Rates  $k_7$  and  $k_8$  represent 2:1 reactions, the former indicates the formation of FruBKA-P and the later represents the generation of fructose-1-P (F1P). Finally,  $k_9$  and  $k_{-9}$  are the constants for binding/unbinding of F1P and the Cra regulator. Besides these parameters, two different sets of degradation constants were defined: the first set for *proteins* and the second one for *metabolites*. The rates for the first group ( $k_{10}$ ,  $k_{12}$ , and  $k_{13}$  in the sketch) are lower than the ones for the second ( $k_{11}$ ,  $k_{14}$ , and  $k_{18}$  in the sketch), as metabolites are degraded much faster than proteins. Finally, rate  $k_{17}$  represents fructose uptake and was measured experimentally (i.e.,  $q_S$ ). As for the initial values for the state of the promoters in the model ( $P_1$  and  $P_2$ ), they were estimated from this work, their state with the regulator bound [ $P(r)_1$  and  $P(r)_2$ ] was set to be 0 at the beginning of the simulation. Note that neither the free Cra protein nor its repressed complex ( $Cra^F$ , bound to F1P) are subjected to degradation rates. This is because they are not subjected to production either; these reactions were deleted for the sake of simplicity (it is just the presence or absence of Cra what matters in the model, and not its production dynamics). The state of all the rest of the individual species was initially set to 0, representing an initial pristine state (see also Table S2 for further details).
