# Supplementary material for: A Metabolic Widget Adjusts the Phosphoenolpyruvate-Dependent Fructose Influx in Pseudomonas putida
Source: PubMed Central journal article supplement (PMC5141268; doi:10.1128/msystems.00154-16), 2016-12-06
Supplement: sys006162068sf5.pdf [file sys006162068sf5.pdf]

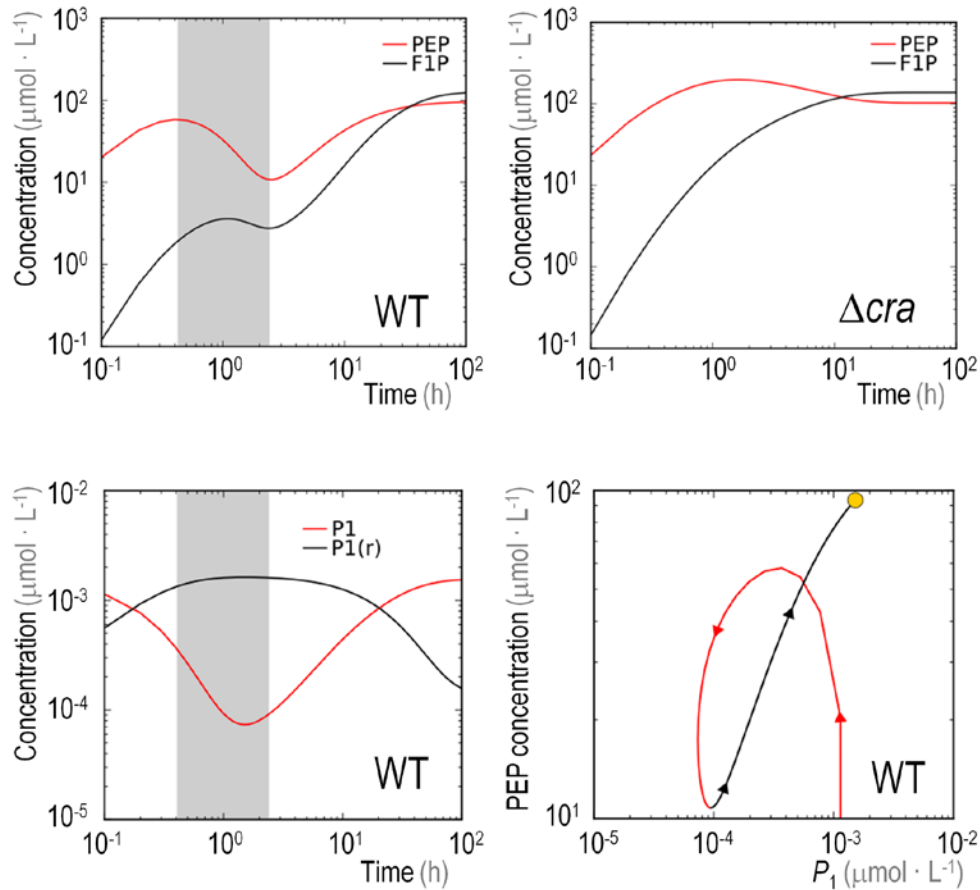

**Fig. S5. Dynamic modeling of the intracellular availability of some molecular species in the metabolic wicket.** *Top row:* phosphoenolpyruvate (PEP) and fructose-1-*P* (F1P) levels over time in the wild-type (WT) cell (*top left*) and in the  $\Delta$ *cra* mutant (*top right*). The levels at the start/end of the graphs are similar, as observed *in vivo*, but the transitions between different states fluctuate substantially. The instability pointed out by the shadowed region (*top left*) is due to the positive feedback of F1P over PEP *via* the inhibition exerted by *Cra*<sup>*P. putida*</sup>. Therefore, in the  $\Delta$ *cra* mutant (*top right*) such an event is not observed. *Bottom left:* The same time-course simulation was repeated but in this case the promoter upstream to *cra* is monitored in its two possible states:  $P_1$ , promoter without *Cra*<sup>*P. putida*</sup> bound to the corresponding operator, and  $P_1(r)$ , promoter with *Cra*<sup>*P. putida*</sup> bound in the corresponding operator (note that the sum of both states is always constant). *Bottom right:* Interaction loop. Relationship between promoter  $P_1$  (when *Cra*<sup>*P. putida*</sup> is not bound to the operator sequence, *x*-axis) and the concentration of PEP (*y*-axis). Initially,  $P_1$  is free of *Cra*<sup>*P. putida*</sup> (far right in the *x*-axis) that is why the PEP concentration is rapidly increasing (going up in the *y*-axis). *Cra*<sup>*P. putida*</sup> starts repressing  $P_1$  (thus going left on *x*-axis) and, as a consequence, the level of PEP decreases (going down in the *y*-axis). Finally, F1P represses *Cra*<sup>*P. putida*</sup>, therefore  $P_1$  is free again and the concentration of PEP increases up to the experimentally measured value (yellow dot).
