# Supplementary material for: A Metabolic Widget Adjusts the Phosphoenolpyruvate-Dependent Fructose Influx in Pseudomonas putida
Source: PubMed Central journal article supplement (PMC5141268; doi:10.1128/msystems.00154-16), 2016-12-06
Supplement: sys006162068st6.pdf [file sys006162068st6.pdf]

**Table S1.** Hypothetical DNA binding sites of the Cra protein in the chromosome of *Pseudomonas putida* KT2440 obtained with the PRODORIC database<sup>a</sup>.

| Start   | End     | Sequence (5' →3') | Gene or locus                       | Product name                                                            | ATG distance | Location |
|---------|---------|-------------------|-------------------------------------|-------------------------------------------------------------------------|--------------|----------|
| 103256  | 103267  | TGAAGCGCTTCT      | <i>PP_0098</i>                      | Hypothetical protein                                                    | 261          | C        |
| 351298  | 351309  | TGAAGCGTTTTTC     | <i>hisA</i><br>( <i>PP_0292</i> )   | Phosphoribosyl formimino-5-aminoimidazole carboxamide ribotideisomerase | 204          | C        |
| 360174  | 360185  | TGAATGGCTTCA      | <i>PP_0300</i>                      | Metallopeptidase                                                        | 163          | C        |
| 650208  | 650219  | TGAAACGTTTCT      | <i>accB</i><br>( <i>PP_0559</i> )   | Acetyl-CoA carboxylase biotin carboxyl carrier protein subunit          | 54           | I        |
| 826630  | 826641  | TGAAGCGATTCT      | <i>PP_0711</i>                      | Isochorismatase superfamily hydrolase                                   | 167          | C        |
| 909364  | 909375  | TGAAACGTTTAA      | <i>cra</i><br>( <i>PP_0792</i> )    | DNA-binding transcriptional regulator Cra                               | 158          | I        |
| 909364  | 909375  | TGAAACGTTTAA      | <i>fruB</i><br>( <i>PP_0793</i> )   | Phosphoenolpyruvate-protein phosphotransferase                          | 116          | I        |
| 1033039 | 1033050 | TGAAGCGGTTAT      | <i>PP_0891</i>                      | Hypothetical protein                                                    | 329          | C        |
| 1151061 | 1151072 | TGAAACGGTTTT      | <i>gap-1</i><br>( <i>PP_1009</i> )  | Glyceraldehyde-3- <i>P</i> dehydrogenase, type I                        | 52           | I        |
| 1151061 | 1151072 | TGAAACGGTTTT      | <i>edd</i><br>( <i>PP_1010</i> )    | Phosphogluconate dehydratase                                            | 202          | I        |
| 1355962 | 1355973 | TGAACCGTTTTT      | <i>PP_1181</i>                      | Winged helix family, two component transcriptional regulator            | 150          | I        |
| 1393535 | 1393546 | TGAAGCGCTTAC      | <i>ruvA</i><br>( <i>PP_1216</i> )   | Holliday junction DNA helicase RuvA                                     | 102          | C        |
| 1427684 | 1427695 | TGAATCGTTTTT      | <i>mgo-2</i><br>( <i>PP_1251</i> )  | Malate:quinone oxidoreductase                                           | 203          | I        |
| 1648807 | 1648818 | TGAAGCGTTTCA      | <i>oprB-2</i><br>( <i>PP_1445</i> ) | Porin                                                                   | 90           | I        |
| 1897251 | 1897262 | TGAATCGTTTTTC     | <i>sugE</i><br>( <i>PP_1701</i> )   | Small multidrug resistance protein                                      | 181          | I        |
| 2090364 | 2090375 | TGAATCGATAAT      | <i>PP_1868</i>                      | DEAD/DEAH box helicase                                                  | 297          | I        |
| 2344873 | 2344884 | TGAATCGTTTGC      | <i>PP_2061</i>                      | Hypothetical protein                                                    | 227          | C        |
| 2589715 | 2589726 | TGAATCGCTTCG      | <i>PP_2267</i>                      | Phage single-stranded DNA-binding protein                               | 225          | I        |
| 2772963 | 2772974 | TGAATCGTTTCA      | <i>PP_2425</i>                      | AraC family transcriptional regulator                                   | 151          | I        |
| 2772963 | 2772974 | TGAATCGTTTCA      | <i>PP_2426</i>                      | D-Isomer specific 2-hydroxyacid dehydrogenase                           | 20           | I        |
| 2879250 | 2879261 | TGAATCGGTTCC      | <i>PP_2533</i>                      | D-Isomer specific 2-hydroxyacid dehydrogenase                           | 248          | C        |
| 3226859 | 3226870 | TGAATGGTTTTT      | <i>PP_2828</i>                      | Hypothetical protein                                                    | 289          | I        |
| 3270160 | 3270171 | TGAATCGCTTCT      | <i>PP_2868</i>                      | Cro/cI family transcriptional regulator                                 | 71           | C        |
| 3899537 | 3899548 | TGAATCGTTTCA      | <i>PP_3443</i>                      | Glyceraldehyde-3- <i>P</i> dehydrogenase                                | 42           | C        |
| 4283210 | 4283221 | TGAATCGCTTTC      | <i>PP_3754</i>                      | β-Ketothiolase                                                          | 175          | C        |
| 4298073 | 4298084 | TGAAACGTTTAT      | <i>PP_3768</i>                      | Shikimate 5-dehydrogenase                                               | 4            | I        |
| 4298073 | 4298084 | TGAAACGTTTAT      | <i>PP_3769</i>                      | Hypothetical protein                                                    | 129          | I        |

|         |         |              |                                   |                                                         |     |   |
|---------|---------|--------------|-----------------------------------|---------------------------------------------------------|-----|---|
| 4310165 | 4310176 | TGAAGCGCTTAT | <i>PP_3783</i>                    | Hypothetical protein                                    | 111 | C |
| 4932527 | 4932538 | TGAACCGTTTCC | <i>fliA</i><br>( <i>PP_4341</i> ) | Flagellar biosynthesis $\sigma$ factor                  | 311 | C |
| 5270454 | 5270465 | TGAAGCGTTTAA | <i>radA</i><br>( <i>PP_4644</i> ) | DNA repair protein RadA                                 | 118 | I |
| 5270454 | 5270465 | TGAAGCGTTTAA | <i>mscL</i><br>( <i>PP_4645</i> ) | Large-conductance mechanosensitive channel              | 48  | I |
| 5283473 | 5283484 | TGAAACGCTTTT | <i>PP_4658</i>                    | Methyl-accepting chemotaxis sensory transducer          | 110 | I |
| 5319697 | 5319708 | TGAAGCGATTTT | <i>ilvB</i><br>( <i>PP_4680</i> ) | Acetolactate synthase 3 catalytic subunit               | 326 | I |
| 5374325 | 5374336 | TGAAGCGCTTCT | <i>dapB</i><br>( <i>PP_4725</i> ) | Dihydrodipicolinate reductase                           | 28  | C |
| 5475045 | 5475056 | TGAATGGCTTAA | <i>proA</i><br>( <i>PP_4811</i> ) | $\gamma$ -Glutamyl- <i>P</i> reductase                  | 254 | I |
| 5475045 | 5475056 | TGAATGGCTTAA | <i>PP_4812</i>                    | DNA glycosylase                                         | 41  | I |
| 5635367 | 5635378 | TGAAACGTTTCC | <i>PP_4948</i>                    | Acyl-CoA dehydrogenase                                  | 250 | I |
| 5753600 | 5753611 | TGAAACGTTTAA | <i>ntrB</i><br>( <i>PP_5047</i> ) | Signal transduction histidine kinase, nitrogen specific | 185 | I |
| 5798118 | 5798129 | TGAAGCGTTTCA | <i>gltB</i><br>( <i>PP_5076</i> ) | Glutamate synthase subunit $\alpha$                     | 228 | I |
| 6079513 | 6079524 | TGAATCGTTTAC | <i>PP_5330</i>                    | Major facilitator family transporter                    | 297 | I |
| 6079513 | 6079524 | TGAATCGTTTAC | <i>PP_5331</i>                    | Thioesterase                                            | 54  | I |
| 6163277 | 6163288 | TGAATCGATTGA | <i>PP_5404</i>                    | Transposition protein, TnsC-like protein                | 14  | C |

<sup>a</sup> Possible binding sites were identified using the PRODORIC database (1, 2). The two first columns of the table represent the coordinates of the putative binding site in nucleotides. In the instances in which no gene name has been assigned to the corresponding open reading frame, the PP number is given according to the annotations of Nelson *et al.* (3) and Belda *et al.* (4). C, coding region; I, intergenic region.

## References

---

1. Grote A, Klein J, Retter I, Haddad I, Behling S, Bunk B, Biegler I, Yarmolinetz S, Jahn D, Münch R. 2009. PRODORIC (release 2009): a database and tool platform for the analysis of gene regulation in prokaryotes. *Nucleic Acids Res.* 37:D61-D65. <http://dx.doi.org/10.1093/nar/gkn837>
2. Münch R, Hiller K, Barg H, Heldt D, Linz S, Wingender E, Jahn D. 2003. PRODORIC: prokaryotic database of gene regulation. *Nucleic Acids Res.* 31:266-269. <http://dx.doi.org/10.1093/nar/gkg037>
3. Nelson KE, Weinel C, Paulsen IT, Dodson RJ, Hilbert H, Martins dos Santos VAP, Fouts DE, Gill SR, Pop M, Holmes M, Brinkac L, Beanan M, DeBoy RT, Daugherty S, Kolonay J, Madupu R, Nelson W, White O, Peterson J, Khouri H, Hance I, Chris Lee P, Holtzapple E, Scanlan D, Tran K, Moazzez A, Utterback T, Rizzo M, Lee K, Kosack D, Moestl D, Wedler H, Lauber J, Stjepandic D, Hoheisel J, Straetz M, Heim S, Kiewitz C, Eisen JA, Timmis KN, Düsterhöft A, Tümmler B, Fraser CM. 2002. Complete genome sequence and comparative analysis of the metabolically versatile *Pseudomonas putida* KT2440. *Environ. Microbiol.* 4:799-808. <http://dx.doi.org/10.1046/j.1462-2920.2002.00366.x>
4. Belda E, van Heck RGA, López-Sánchez MJ, Cruveiller S, Barbe V, Fraser C, Klenk HP, Petersen J, Morgat A, Nikel PI, Vallenet D, Rouy Z, Sekowska A, Martins dos Santos VAP, de Lorenzo V, Danchin A, Médigue C. 2016. The revisited genome of *Pseudomonas putida* KT2440 enlightens its value as a robust metabolic *chassis*. *Environ. Microbiol.*, In press, <http://dx.doi.org/10.1111/1462-2920.13230>
